# Supplementary material for: Early-life respiratory syncytial virus lower respiratory tract infection in a South African birth cohort: epidemiology and effect on lung health
Source: PubMed Central journal article supplement (PMC7511798; doi:10.1016/s2214-109x(20)30251-5), 2020-09-21
Supplement: mmc1.pdf [file mmc1.pdf]

# THE LANCET

## Global Health

### Supplementary appendix

This appendix formed part of the original submission and has been peer reviewed. We post it as supplied by the authors.

Supplement to: Zar HJ, Nduru P, Stadler JAM, et al. Early-life respiratory syncytial virus lower respiratory tract infection in a South African birth cohort: epidemiology and effect on lung health. *Lancet Glob Health* 2020; **8**: e1316–25.

**Supplement Table 1:** Results of unadjusted modelling of risk factors associated with any LRTI (Model A) and RSV-associated LRTI (Model B, C) in the first two years of life in the DCHS.

| Risk factor                                   | Model A: LRTI vs no LRTI |         | Model B: RSV-LRTI vs non-RSV LRTI |         | Model C: RSV-LRTI vs no LRTI |         |
|-----------------------------------------------|--------------------------|---------|-----------------------------------|---------|------------------------------|---------|
|                                               | Crude                    | p-value | Crude                             | p-value | Crude                        | p-value |
|                                               | IRR (95% CI)             |         | IRR (95% CI)                      |         | IRR (95% CI)                 |         |
| Sex: Male (ref: female)                       | 1.53 (1.26-1.85)         | <0.0001 | 0.79 (0.64-0.98)                  | 0.033   | 1.17 (0.88-1.58)             | 0.31    |
| Season of birth (ref: Summer):                |                          |         |                                   |         |                              |         |
| Autumn (Mar-May)                              | 1.39 (1.09-1.79)         | 0.0090  | 1.10 (0.85-1.43)                  | 0.46    | 1.48 (1.03-2.11)             | 0.032   |
| Winter (June-Aug)                             | 0.93 (0.72-1.21)         | 0.61    | 0.83 (0.61-1.12)                  | 0.22    | 0.67 (0.43-1.05)             | 0.22    |
| Spring (Sept-Nov)                             | 1.07 (0.81-1.40)         | 0.63    | 0.59 (0.38-0.90)                  | 0.015   | 0.47 (0.27-0.81)             | 0.0067  |
| Socio-economic quartile (ref: high):          |                          |         |                                   |         |                              |         |
| Lowest                                        | 1.40 (1.06-1.85)         | 0.019   | 0.77 (0.55-1.09)                  | 0.14    | 1.20 (0.75-1.91)             | 0.46    |
| Low- moderate                                 | 1.51 (1.15-1.99)         | 0.0032  | 0.92 (0.69-1.23)                  | 0.58    | 1.49 (0.97-2.27)             | 0.068   |
| Moderate- high                                | 1.06 (0.80-1.40)         | 0.70    | 1.08 (0.81-1.45)                  | 0.61    | 1.35 (0.87-2.09)             | 0.18    |
| HIV Exposed (ref: HIV unexposed)              | 1.50 (1.22-1.83)         | 0.0001  | 0.81 (0.63-1.04)                  | 0.097   | 1.10 (0.78-1.55)             | 0.57    |
| Maternal Smoking in pregnancy (Self report):  |                          |         |                                   |         |                              |         |
| Smoker (ref: non-smoker)                      | 1.04 (0.85-1.27)         | 0.82    | 1.31 (1.05-1.62)                  | 0.016   | 1.41 (1.04-1.92)             | 0.029   |
| Maternal Smoking post birth (Self report):    |                          |         |                                   |         |                              |         |
| Smoker (ref: non-smoker)                      | 1.04 (0.85-1.27)         | 0.71    | 1.33 (1.07-1.65)                  | 0.0090  | 1.33 (0.98-1.80)             | 0.063   |
| Presence of other children in the household   | 1.04 (0.77-1.40)         | 0.79    | 1.12 (0.81-1.54)                  | 0.49    | 1.72 (1.03-2.88)             | 0.039   |
| Lower birth weight (<2.5kg)                   | 1.63 (1.28-2.06)         | <0.0001 | 0.83 (0.63-1.11)                  | 0.21    | 1.26 (0.85-1.88)             | 0.25    |
| Exclusive breastfeeding at 6 weeks (ref: no)  | 0.89 (0.74-1.08)         | 0.25    | 1.02 (0.82-1.27)                  | 0.85    | 0.94 (0.73-1.21)             | 0.25    |
| Exclusive breastfeeding at 3 months (ref: no) | 1.04 (0.84-1.30)         | 0.70    | 0.95 (0.74-1.22)                  | 0.71    | 1.02 (0.77-1.35)             | 0.91    |
| Infant age (unit increase in years)           | 0.46 (0.40-0.52)         | <0.0001 | 0.78 (0.64-0.96)                  | 0.020   | 0.59 (0.53-0.65)             | <0.0001 |
| Preterm (<37 weeks' gestation)                | 1.51 (1.19-1.92)         | <0.001  | 0.88 (0.67-1.14)                  | 0.32    | 1.14 (0.78-1.68)             | 0.49    |

Table notes: Analyses done using generalized estimating equations; results presented as incidence rate ratios with 95% confidence intervals. Abbreviations: LRTI=lower respiratory tract infection; RSV=respiratory syncytial virus; HIV=human immunodeficiency virus; DCHS=Drakenstein Child Health Study

**Supplement Table 2:** Clinical characteristics of RSV-LRTI compared to non-RSV LRTI cases in the DCHS

|                                          | <b>RSV LRTI</b> | <b>Non-RSV LRTI</b> | <b>P-Values</b>   |
|------------------------------------------|-----------------|---------------------|-------------------|
|                                          | <b>n=164</b>    | <b>n=621</b>        |                   |
| Median age at onset (IQR) days           | 198 (92 – 371)  | 213 (112 – 437)     | 0.074             |
| Age category at presentation:            |                 |                     |                   |
| 0-1 years                                | 121 (74)        | 408 (66)            | 0.050             |
| 1-2 years                                | 43 (26)         | 213 (34)            |                   |
| Site of recruitment:                     |                 |                     |                   |
| Mbekweni                                 | 90 (55)         | 394 (63)            | <b>0.036</b>      |
| TC Newman                                | 74 (45)         | 227 (37)            |                   |
| Season of presentation: Autumn (Mar-May) | 82 (50)         | 140 (23)            | <b>&lt;0.0001</b> |
| Winter (June-Aug)                        | 79 (48)         | 177 (29)            |                   |
| Spring (Sept-Nov)                        | 3 (2)           | 196 (32)            |                   |
| Summer (Dec-Feb)                         | 0 (0)           | 108 (17)            |                   |
| <b>Presenting symptoms</b>               |                 |                     |                   |
| Median temperature (°C) (IQR)            | 37 (37 – 38)    | 37 (36 – 37)        | 0.11              |
| Median heart rate (IQR)                  | 152 (136 – 164) | 142 (132 – 160)     | <b>&lt;0.0001</b> |
| Median respiratory rate (bpm) (IQR)      | 56 (50 – 62)    | 54 (48 – 60)        | <b>0.0012</b>     |
| Oxygen saturation (%) (IQR)              | 97 (93 – 98)    | 98 (95 – 99)        | <b>&lt;0.0001</b> |
| Lower chest indrawing present            | 130 (80)        | 406 (67)            | <b>0.0040</b>     |
| Any oxygen received                      | 32 (20)         | 56 (9)              | <b>&lt;0.0001</b> |
| Wheezing at time of LRTI                 | 95 (58)         | 224 (36)            | <b>&lt;0.0001</b> |
| Admitted to hospital                     | 54 (33)         | 109 (18)            | <b>&lt;0.0001</b> |
| Median days of hospitalisation (IQR)     | 4 (2-6)         | 3 (2-5)             | 0.12              |

Abbreviations: LRTI=lower respiratory tract infection; RSV=respiratory syncytial virus; IQR=interquartile range; bpm=beats per minute; DCHS=Drakenstein Child Health Study

**Supplement Table 3:** Incidence of recurrent LRTI following first LRTI in the DCHS

| <b>Category of First LRTI</b> | <b>Incidence (e/cy; 95% CI) of 2 or more LRTI episodes after 1<sup>st</sup> LRTI</b> | <b>P-value</b>    |
|-------------------------------|--------------------------------------------------------------------------------------|-------------------|
| RSV-LRTI                      | 0.32 (0.22-0.48)                                                                     | <b>&lt;0.0001</b> |
| Non-RSV LRTI                  | 0.10 (0.07-0.16)                                                                     |                   |
| Hospitalised LRTI             | 0.14 (0.09 - 0.21)                                                                   | <b>0.0031</b>     |
| Ambulatory LRTI               | 0.06 (0.04 - 0.09)                                                                   |                   |
| RSV-hospitalised LRTI         | 0.12 (0.06 - 0.24)                                                                   | <b>0.012</b>      |
| RSV- ambulatory LRTI          | 0.02 (0.01 - 0.09)                                                                   |                   |
| RSV-hospitalised LRTI         | 0.12 (0.06 - 0.24)                                                                   | <b>0.012</b>      |
| Non-RSV hospitalised LRTI     | 0.02 (0.01 - 0.09)                                                                   |                   |

Abbreviations: LRTI=lower respiratory tract infection; e/cy = episodes per child-year; CI=confidence interval; RSV=respiratory syncytial virus; DCHS=Drakenstein Child Health Study
